# Supplementary material
Source: Springer Nature journal article supplement (https://www.springermedizin.de/resource/supplementary/13011_2012_222_MOESM3_ESM.pdf/9628644)
Supplement: MOESM3 [file 9628644]

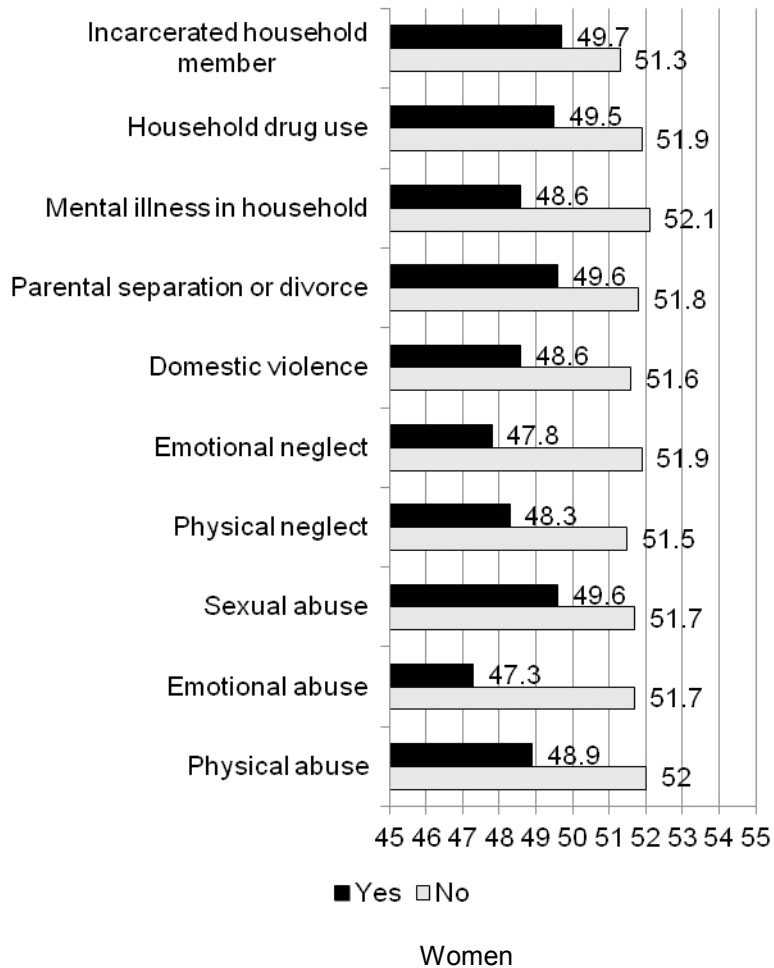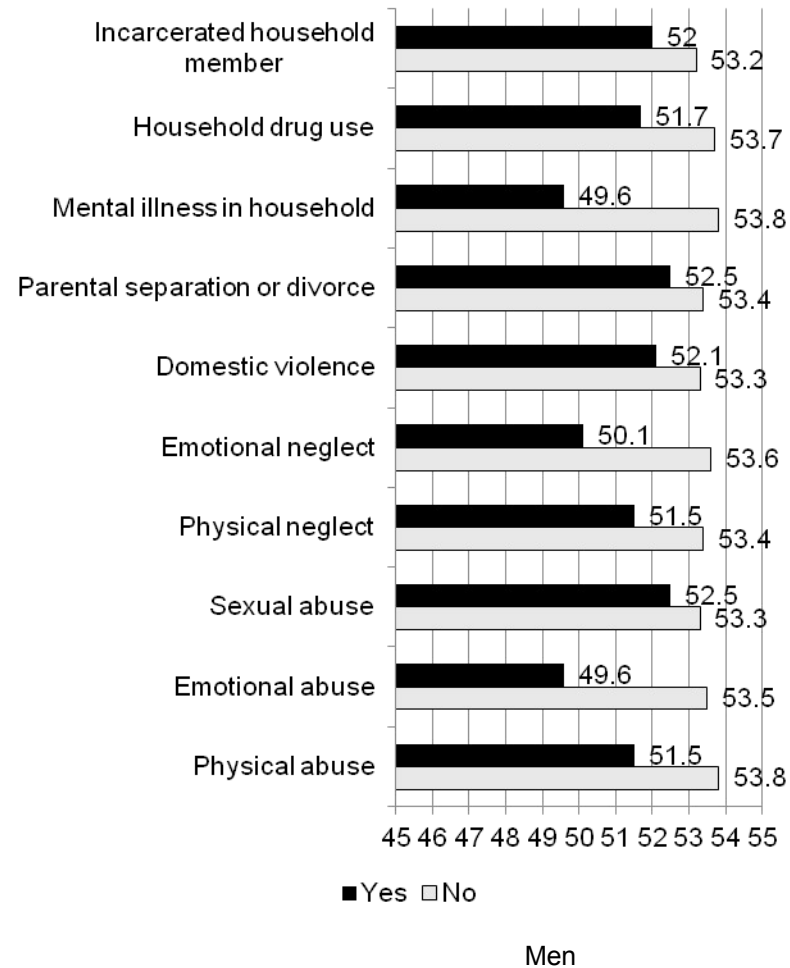

\* MCS score is developed from the SF-36. Level of psychological distress increases as the MCS score decreases.
